# Supplementary material
Source: Copernicus journal article supplement (doi:10.5194/egusphere-2026-3119)
Supplement: Supplementary file 1 [file egusphere-2026-3119-supplement.pdf]

**Table S1:** Statistical metrics comparing the gross primary productivity (GPP), evapotranspiration (ET), and water use efficiency (WUE) estimated by ISBA-A-g<sub>s</sub> against in situ measurements at FR-Lam site (units of RMSE are gC m<sup>-2</sup> day<sup>-1</sup> for GPP, kg H<sub>2</sub>O m<sup>-2</sup> day<sup>-1</sup> for ET, and gC kg<sup>-1</sup> H<sub>2</sub>O for WUE) at daily-scale. In bold fonts are cases when ISBA-A-g<sub>s</sub> gave better scores (R<sup>2</sup>).

| Maize year | Scenario           | Metric         | GPP         | ET          | WUE         |
|------------|--------------------|----------------|-------------|-------------|-------------|
| 2006       | Before Calibration | R <sup>2</sup> | 0.85        | 0.71        | 0.61        |
|            |                    | RMSE           | 2.35        | 1.96        | 0.62        |
|            | After Calibration  | R <sup>2</sup> | <b>0.88</b> | <b>0.70</b> | <b>0.64</b> |
|            |                    | RMSE           | <b>2.30</b> | <b>1.80</b> | <b>0.59</b> |
| 2008       | Before Calibration | R <sup>2</sup> | 0.93        | 0.70        | 0.72        |
|            |                    | RMSE           | 2.21        | 2.12        | 0.99        |
|            | After Calibration  | R <sup>2</sup> | <b>0.93</b> | <b>0.71</b> | <b>0.78</b> |
|            |                    | RMSE           | <b>1.89</b> | <b>2.05</b> | <b>0.71</b> |
| 2010       | Before Calibration | R <sup>2</sup> | 0.90        | 0.61        | 0.41        |
|            |                    | RMSE           | 2.18        | 1.54        | 0.83        |
|            | After Calibration  | R <sup>2</sup> | <b>0.92</b> | <b>0.60</b> | <b>0.61</b> |
|            |                    | RMSE           | <b>1.88</b> | <b>1.53</b> | <b>0.66</b> |
| 2012       | Before Calibration | R <sup>2</sup> | 0.88        | 0.57        | 0.35        |

|                   |                    |             |             |             |             |
|-------------------|--------------------|-------------|-------------|-------------|-------------|
|                   |                    | RMSE        | 3.61        | 1.48        | 1.0         |
|                   | After Calibration  | $R^2$       | <b>0.89</b> | <b>0.56</b> | <b>0.67</b> |
|                   |                    | RMSE        | <b>3.19</b> | <b>1.51</b> | <b>0.66</b> |
| 2014              | Before Calibration | $R^2$       | 0.84        | 0.68        | 0.62        |
|                   |                    | RMSE        | 4.88        | 2.36        | 0.73        |
|                   | After Calibration  | $R^2$       | <b>0.80</b> | <b>0.68</b> | <b>0.86</b> |
|                   |                    | RMSE        | <b>4.35</b> | <b>2.22</b> | <b>1.62</b> |
|                   | Before Calibration | $R^2$       | 0.91        | 0.86        | 0.33        |
|                   |                    | RMSE        | 2.46        | 1.63        | 1.02        |
| After Calibration | $R^2$              | <b>0.92</b> | <b>0.62</b> | <b>0.38</b> |             |
|                   | RMSE               | <b>2.92</b> | <b>0.72</b> | <b>0.70</b> |             |

**Table S2:** Statistical metrics comparing the gross primary productivity (GPP), evapotranspiration (ET), and water use efficiency (WUE) estimated by ISBA-A-g<sub>s</sub> against in situ measurements at Ind-IITH site (units of RMSE are gC m<sup>-2</sup> day<sup>-1</sup> for GPP, kg H<sub>2</sub>O m<sup>-2</sup> day<sup>-1</sup> for ET, and gC kg<sup>-1</sup> H<sub>2</sub>O for WUE) at daily-scale. In bold fonts are cases when ISBA-A-g<sub>s</sub> gave better scores (R<sup>2</sup>).

| Maize year | Irrigation Type | Scenario           | Metric             | GPP            | ET          | WUE         |      |
|------------|-----------------|--------------------|--------------------|----------------|-------------|-------------|------|
| Monsoon    | CFI             | Before Calibration | R <sup>2</sup>     | 0.78           | 0.35        | 0.25        |      |
|            |                 |                    | RMSE               | 2.13           | 1.71        | 0.72        |      |
|            | CFI             | After Calibration  | R <sup>2</sup>     | <b>0.83</b>    | <b>0.35</b> | <b>0.30</b> |      |
|            |                 |                    | RMSE               | <b>1.83</b>    | <b>1.71</b> | <b>0.61</b> |      |
|            | Monsoon         | AFI                | Before Calibration | R <sup>2</sup> | 0.50        | 0.41        | 0.23 |
|            |                 |                    |                    | RMSE           | 2.59        | 1.68        | 1.10 |
| AFI        |                 | After Calibration  | R <sup>2</sup>     | <b>0.66</b>    | <b>0.43</b> | <b>0.31</b> |      |
|            |                 |                    | RMSE               | <b>2.08</b>    | <b>1.29</b> | <b>1.01</b> |      |
| Winter     | CFI             | Before Calibration | R <sup>2</sup>     | 0.67           | 0.40        | 0.25        |      |
|            |                 |                    | RMSE               | 2.59           | 1.40        | 0.72        |      |
|            | CFI             | After Calibration  | R <sup>2</sup>     | <b>0.79</b>    | <b>0.43</b> | <b>0.37</b> |      |

|        |     |                    |       |             |             |             |
|--------|-----|--------------------|-------|-------------|-------------|-------------|
|        |     |                    | RMSE  | <b>2.08</b> | <b>1.29</b> | <b>0.64</b> |
|        |     |                    | $R^2$ | 0.80        | 0.20        | 0.20        |
|        | AFI | Before Calibration | RMSE  | 2.43        | 1.97        | 1.48        |
| Winter |     |                    | $R^2$ | <b>0.86</b> | <b>0.25</b> | <b>0.25</b> |
|        | AFI | After Calibration  | RMSE  | <b>1.86</b> | <b>1.87</b> | <b>1.22</b> |
